# Supplementary material for: Two-dimensional C3N/blue phosphorene vdW heterostructure for Li, Na and K-ion batteries
Source: Royal Society of Chemistry journal article supplement (doi:10.1039/d1nj01594j), 2021-01-01
Supplement: d1nj01594j1.pdf [file d1nj01594j1.pdf]

# Two-dimensional C<sub>3</sub>N/Blue Phosphorene vdW Heterostructure for Li, Na and K-ion batteries.

Mohammad Ubaid,<sup>a\*</sup> Anver Aziz<sup>a</sup> and Bhalchandra S Pujari<sup>b</sup>

<sup>a</sup>Department of Physics, Jamia Millia Islamia, New Delhi 110025, India

<sup>b</sup>Department of Scientific Computing, Modeling & Simulation, Savitribai Phule Pune University, Pune 411007, India

E-mail: ubaidm020@gmail.com

## Phonon dispersion spectrum of C<sub>3</sub>N/BP HS

We have investigated the phonon dispersion spectrum of C<sub>3</sub>N/BP HS and shown in figure S1. It is always challenging to assess the phonons for heterostructure, which constitute the lattice mismatch. We indeed see some imaginary phonons which are clearly due to the lattice mismatch. However, we must point out that the frequencies of the imaginary modes are small (<100Hz). It may appear as a hindrance to form the heterostructure, however, owing to the low values, the structure can be stabilized by an appropriate substrate, which is typically the case with such systems.

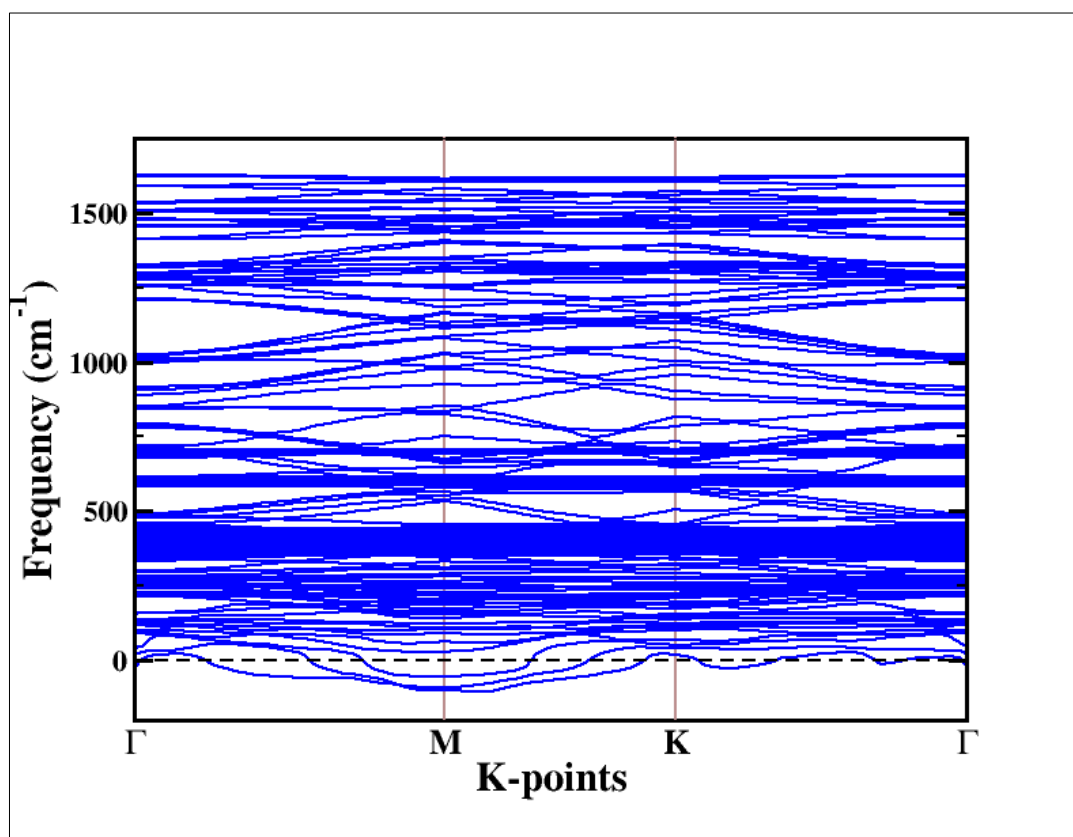

Fig. S1 Calculated dispersion spectrums of C<sub>3</sub>N/BP HS.

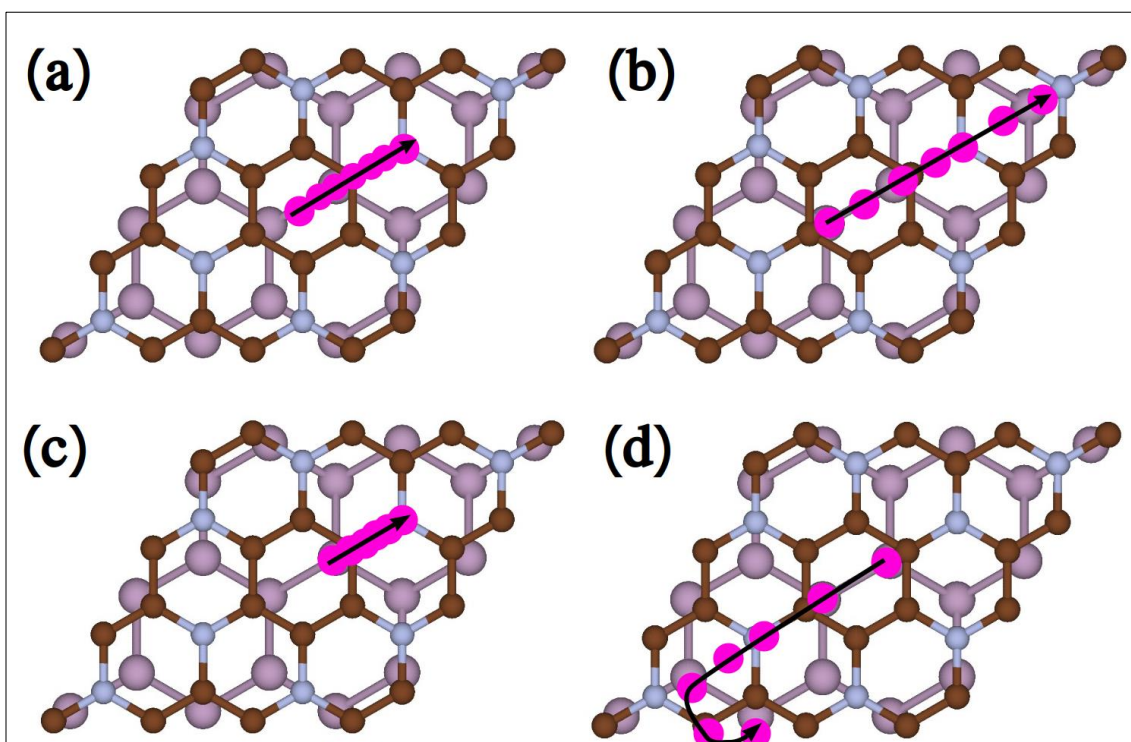

Fig. S2 The migration pathways of X (Li/Na/K) in the interlayer of  $C_3N/BP$  HS.

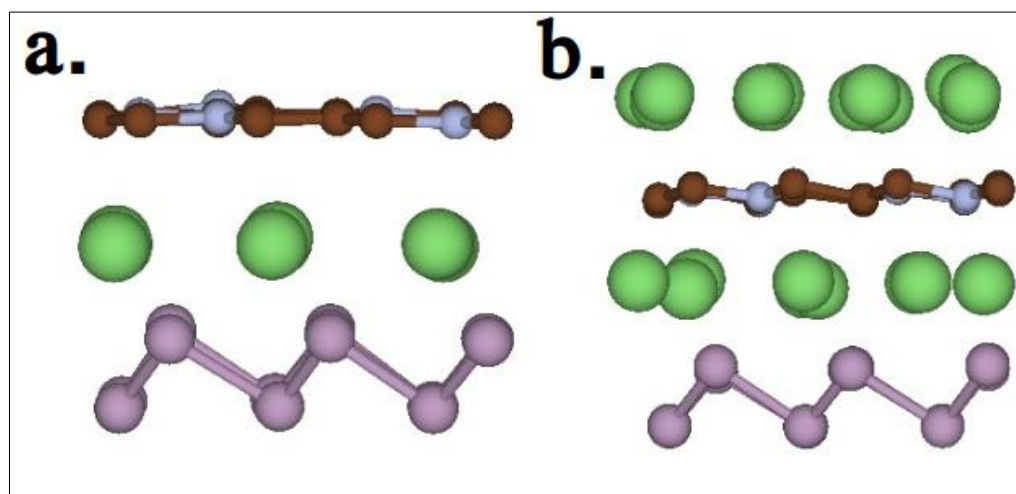

Fig. S3 The optimized structures of Li inserted  $C_3N/BP$  HS. (a)  $C_3N/9Li/BP$  and (b)  $16Li/C_3N/9Li/BP$ .

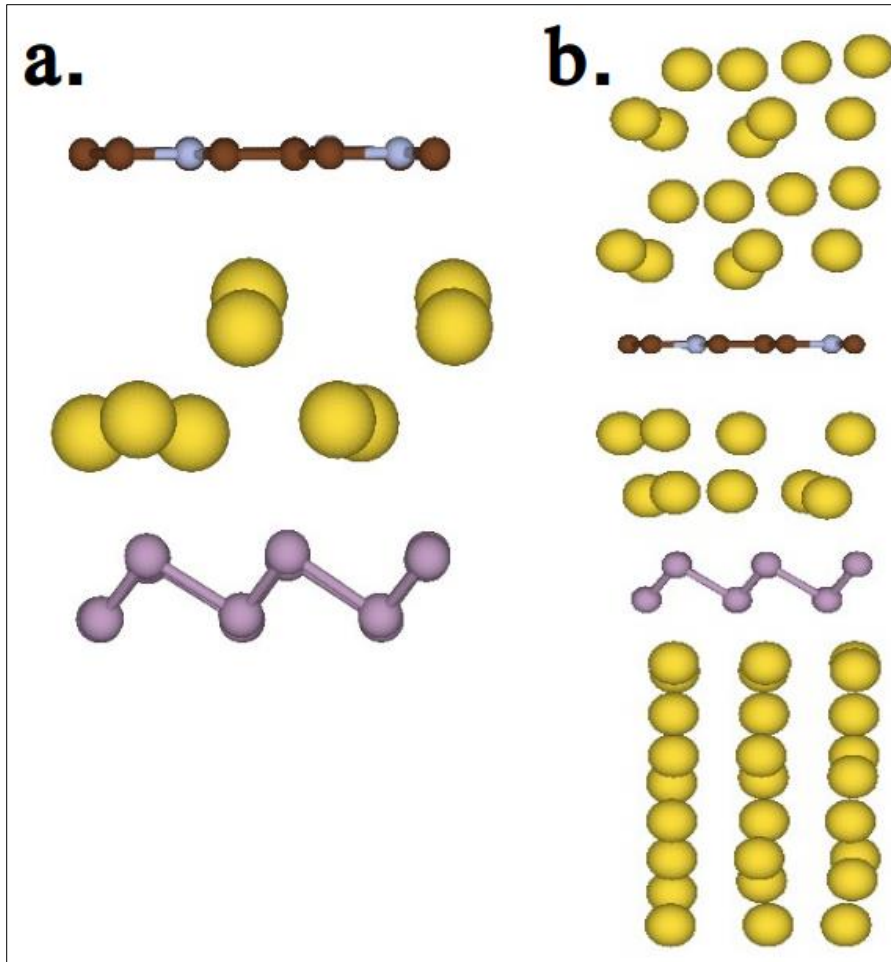

*Fig. S4 The optimized structures of Na inserted C<sub>3</sub>N/BP HS. (a) C<sub>3</sub>N/9Na/BP and (b) 18Na/C<sub>3</sub>N/9Na/BP/27Na.*

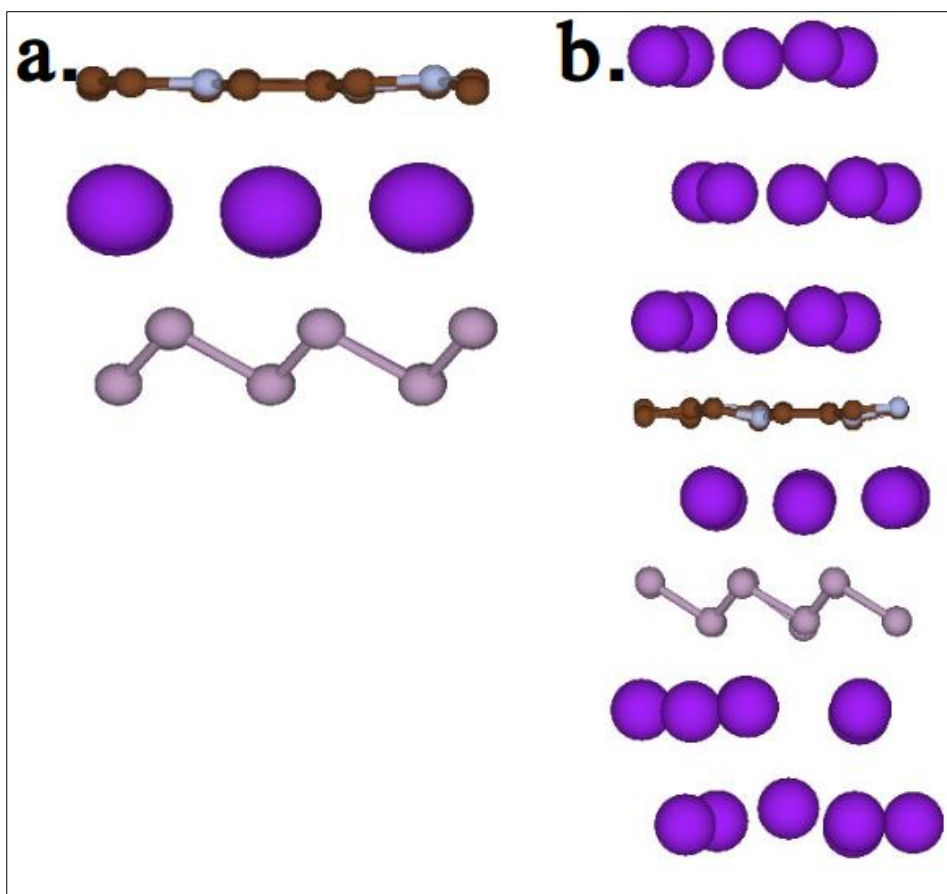

Fig. S5 The optimized structures of K inserted  $C_3N/BP$  HS. (a)  $C_3N/9K/BP$  and (b)  $15K/C_3N/9K/BP/12K$ .
